# Supplementary material for: KDM6A–SND1 interaction maintains genomic stability by protecting the nascent DNA and contributes to cancer chemoresistance
Source: PubMed Central journal article supplement (PMC11260493; doi:10.1093/nar/gkae487), 2024-06-08

## Supplementary Figures and Figure Legends

### **Fig. S1 The colocalization of KDM6A with RPA1 in HeLa cells treated with CPT.**

Representative images with scale bars (5  $\mu\text{m}$ ) are shown.

### **Fig. S2 KDM6A could recruit Ku70 protein on nascent DNA through TPR domain.**

(A) CPT treatment could enhance the interaction of KDM6A with Ku70. Co-IP was performed in cells treated with CPT followed by western blot with indicated antibodies.

(B) The association of KDM6A with Ku70 in HeLa cells treated with CPT. Representative images with scale bars (5  $\mu\text{m}$ ) are shown. (C) Detection of the

interaction between SND1 either with Ku70 or PCNA. SND1 was immunoprecipitated using specific antibodies against SND1, followed by western blot with indicated

antibodies. (D) Co-IP confirmed that TPR domain mediated the interaction of

KDMA6A and Ku70. (E) SND1 knockdown attenuated the enrichment of KDM6A and Ku70 on nascent DNA which could be restored by wild-type SND1 and TSNA $\Delta$  truncation.

### **Fig. S3. KDM6A regulated the stability of replication forks through SUMOylation.**

(A) Predicted SUMOylation sites in KDM6A protein. (B) BrdU and EdU were incorporated into nascent DNA for observing the formation of replication forks foci in HeLa cells. The histogram showed the number of replication foci formation in indicated cells. \* $p < 0.05$ .

### **Fig. S4. The characteristic of KDM6A expression in various tumors.**

(A) A pancancer analysis of KDM6A expression using TCGA data base. (B) KDM6A expression and mutations in ESCC was analyzed using data from public database Cbioportal. \* $p < 0.05$ , \*\* $p < 0.01$ . \*\*\* $p < 0.001$ .

### **Fig. S5. KDM6A mutation involved in the genomic stability of ESCC.**

(A) Cellular viability in the presence of genotoxin CPT for ESCC Kyse150 cells knocked down

endogenous KDM6A and followed by transfection with the plasmid of KDM6Awt or KDM6A mutants respectively. (B) Western blot for phospho-RPA32<sup>S4/S8</sup> and  $\gamma$ H2AX detection in ESCC cells lacking KDM6A with KDM6Awt or KDM6A mutant plasmid transfection respectively.

Figure S1

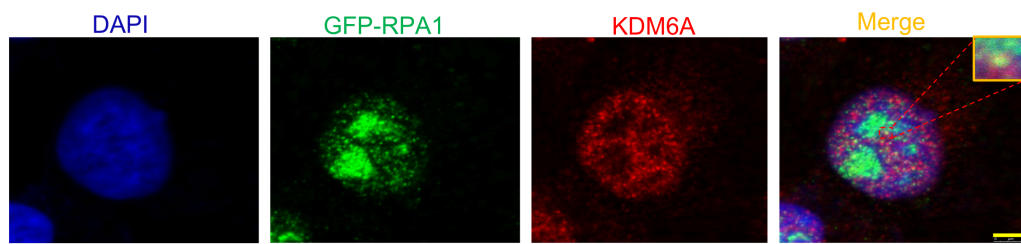

**Figure S2**

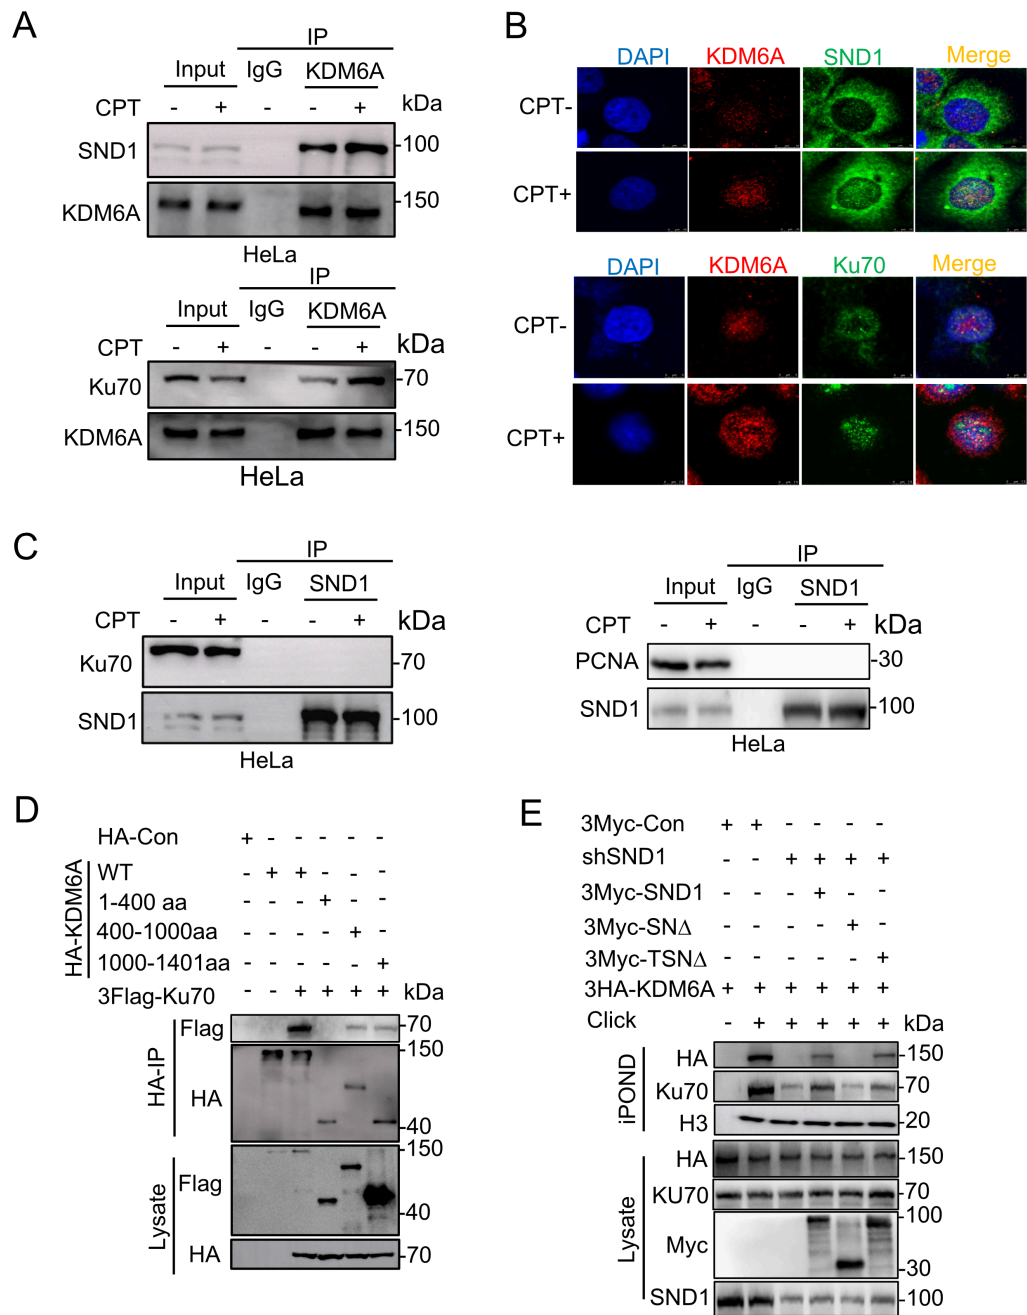

Figure S3

A

| Results for putatifs SUMO site |                        |         |                  |      |        |                      |      |        |   |
|--------------------------------|------------------------|---------|------------------|------|--------|----------------------|------|--------|---|
| Position K                     | Sequence               | Best PS | Consensus direct |      |        | Consensus Inverted   |      |        |   |
|                                |                        |         | Type             | PSd  | DB Hit | Type                 | PSi  | DB Hit |   |
| K2                             | -----MKSCGVSLATAA      | None    | None             | None | None   | None                 | None | None   | 1 |
| K23                            | AAAAAFGDEEKGGMAAGKASGE | Low     | None             | None | None   | None                 | Low  | None   | 1 |
| K24                            | AAAAFGDEEKGMPLAGKASGES | Low     | None             | None | None   | Consensus inv        | Low  | None   | 1 |
| K86                            | AVRCYESLIKAEKVESDEF    | Low     | NDSM             | Low  | 8      | None                 | None | None   | 1 |
| K90                            | YESLILKAEKVESDFFCQLG   | High    | Weak Consensus   | None | 2      | Strong consensus inv | High | None   | 1 |
| K111                           | HFNLLLEDYFKALSAYQRYYS  | None    | None             | None | None   | None                 | None | None   | 1 |
| K151                           | FHYNAFQWAIKAEFOEVLVDF  | None    | None             | None | None   | None                 | None | None   | 1 |
| K242                           | LQTNLSAQVKAATVLQQLGM   | None    | None             | None | None   | None                 | None | None   | 2 |
| K265                           | TVDLLGDKATKESVAIQYLQK  | None    | None             | None | None   | None                 | None | None   | 1 |
| K275                           | KESVAIQYLQKSLADPNSGQ   | None    | None             | None | None   | None                 | None | None   | 1 |
| K299                           | FLGRCYSSIGKVDAFISYRQ   | None    | None             | None | None   | None                 | None | None   | 2 |
| K313                           | AFISYRQSIDKSEASADTWCS  | None    | None             | None | 1      | None                 | None | None   | 1 |
| K716                           | SGGQQGITLTKESKFSGNILT  | None    | None             | None | None   | None                 | None | None   | 1 |
| K719                           | QQGITLIKESKSGNILLTPE   | High    | None             | None | None   | Consensus inv        | High | None   | 1 |
| K867                           | EGMEESQSPKTDLLLVNHKF   | Low     | Consensus        | Low  | None   | None                 | None | None   | 1 |
| K905                           | EVLKACRNLGKNGLSNSSL    | None    | None             | None | None   | None                 | None | None   | 1 |
| K978                           | TVIRGLAGAKLGLGFSTKT    | Low     | Strong Consensus | Low  | None   | None                 | None | None   | 1 |
| K1076                          | TSSDNSGRRRKGFFKTIKFGI  | None    | None             | None | None   | None                 | None | None   | 1 |
| K1095                          | GTNIDLSDKRWLQLHELTK    | None    | None             | None | None   | Consensus inv        | None | None   | 1 |
| K1265                          | RYENKIQSVKSLVFMVHLSW   | None    | None             | None | None   | None                 | None | None   | 1 |
| K1287                          | MARNIKVSDPKLFEMIKYCLL  | Low     | None             | None | None   | Strong consensus inv | Low  | None   | 1 |
| K1301                          | MIKYCLRLTKQCOTLREALI   | None    | None             | None | None   | None                 | None | None   | 3 |
| K1324                          | GKEIIWHGRTEKPEAHYCSIC  | None    | None             | None | 1      | None                 | None | None   | 1 |
| K1379                          | LENFVVLEQYKMEDLMQVYDQ  | None    | Weak Consensus   | None | None   | None                 | None | None   | 1 |

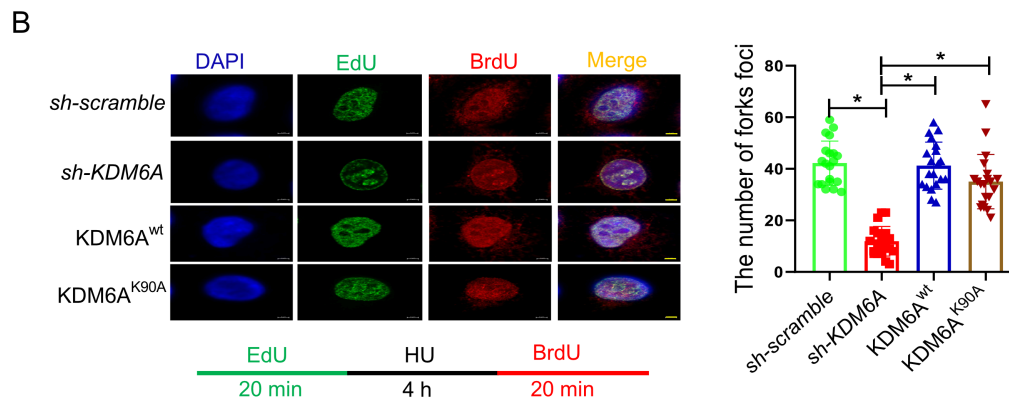

Figure S4

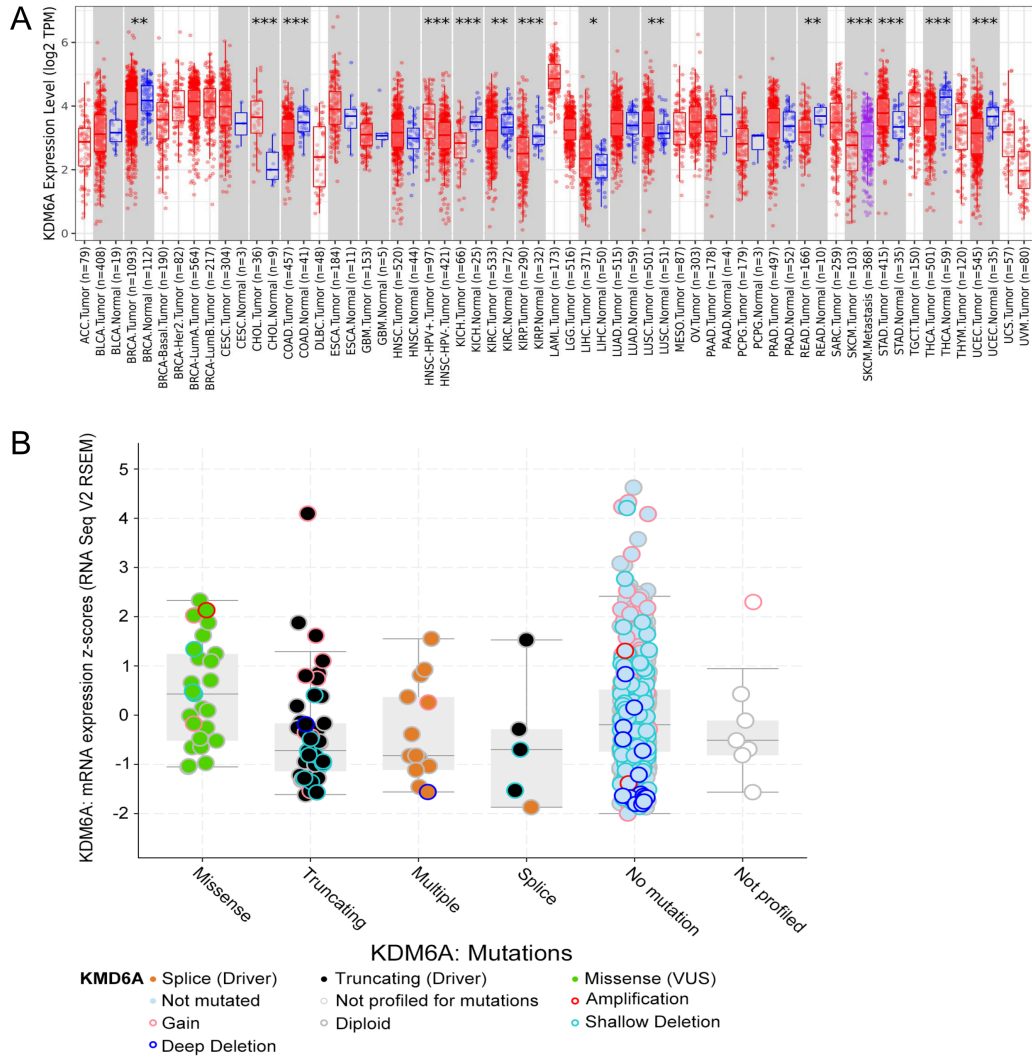

**Figure S5**

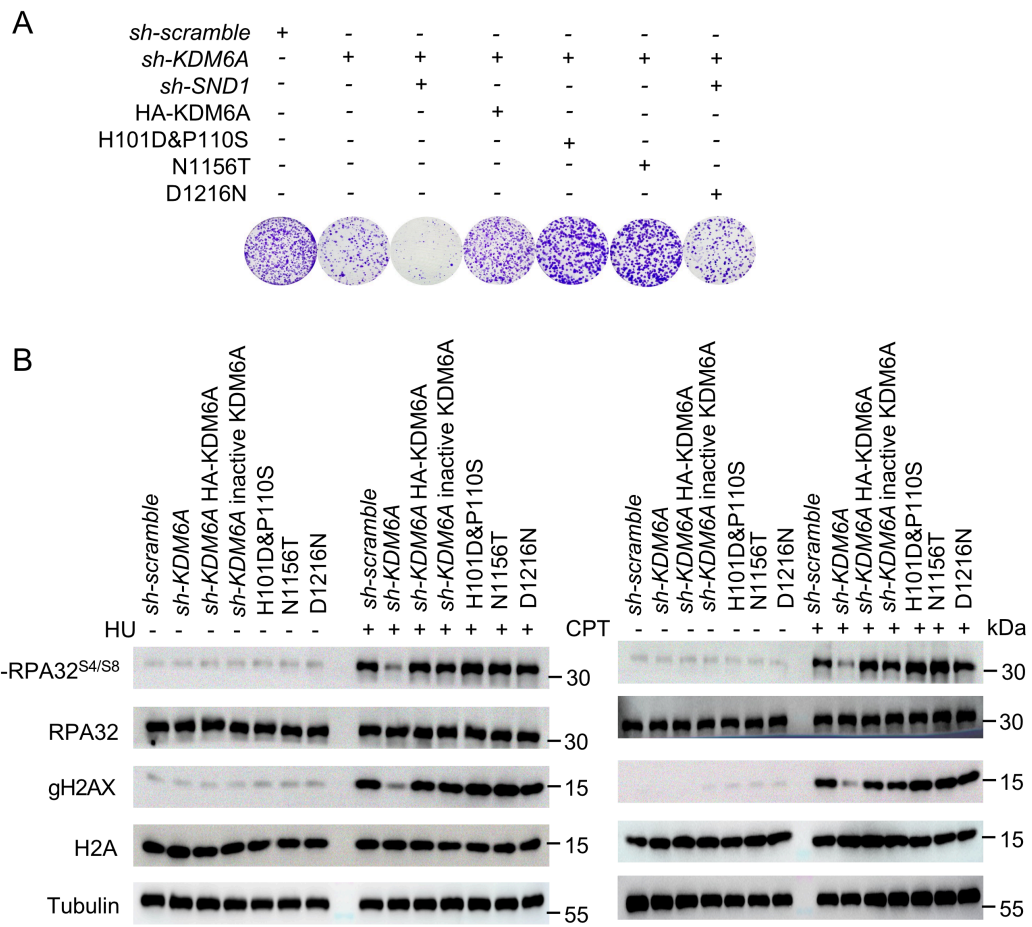

Supplement: gkae487_supplemental_file.pdf [file gkae487_supplemental_file.pdf]
